# Supplementary material
Source: publisher figshare collection journal article supplement (https://frontiersin.figshare.com/ndownloader/files/21931803)
Supplement: Supplementary file 1 [file 21931803]

**Movement of moths through riparian reserves within oil palm plantations**

**Ross E. J. Gray1,2*, Eleanor M. Slade1, 3, Arthur Y. C. Chung4 and Owen T. Lewis1**

1 Department of Zoology, University of Oxford, South Parks Road, Oxford OX1 3PS, UK.

2 Department of Life Sciences, Imperial College London, Silwood Park Campus, Buckhurst Road, Ascot, SL5 7PY, UK.

3 Asian School of the Environment, Nanyang Technological University, 50 Nanyang Avenue, Singapore 639798.

4 Forest Research Centre, Forestry Department, P.O. Box 1407, 90715 Sandakan, Sabah, Malaysia.

**Supplementary Tables**

Table S1. Summary table showing the number of marked (M) and recaptured (R) moths at each site.

|  | ***Ischyja* spp.** | | | ***Erebus camprimulgus* (male)** | | | | ***Erebus caprimulgus* (female)** | | | ***Erebus gemmans*** | | | ***Hypoprya* spp*.*** | | | ***Erebus ephesperis*** | | | **Totals** | | |
| --- | --- | --- | --- | --- | --- | --- | --- | --- | --- | --- | --- | --- | --- | --- | --- | --- | --- | --- | --- | --- | --- | --- |
| **Site** | **M** | **R** | **R %** | | **M** | **R** | **R %** | **M** | **R** | **R %** | **M** | **R** | **R %** | **M** | **R** | **R %** | **M** | **R** | **R %** | **M** | **R** | **R %** |
| RR3 | 59 | 7 | 11.9 | | 36 | 7 | 19.4 | 97 | 33 | 34.0 | 6 | 4 | 66.7 | - | - | - | 42 | 6 | 14.2 | 240 | 57 | 23.8 |
| RR10 | 70 | 23 | 32.9 | | 22 | 10 | 45.5 | 38 | 14 | 36.8 | 1 | 0 | 0.0 | 39 | 24 | 61.5 | 28 | 10 | 35.7 | 198 | 81 | 40.9 |
| RR18 | 75 | 33 | 44.0 | | 28 | 10 | 35.7 | 53 | 10 | 18.9 | 42 | 13 | 31.0 | 24 | 18 | 75.0 | 169 | 59 | 34.9 | 391 | 143 | 36.6 |
| Total and Mean % | 204 | 63 | 29.6 | | 86 | 27 | 33.5 | 188 | 57 | 29.9 | 49 | 22 | 32.6 | 63 | 42 | 45.5 | 239 | 75 | 31.4 | 829 | 281 | 33.7 |

Table S2. Summary table showing the mean, median and maximum dispersal distance per 24-hour period for each moth species at each site. Errors shown are standard deviation. Movements are the minimum distance moved between release and recapture.

|  | ***Ischyja* spp.** | | | ***Erebus camprimulgus* (male)** | | |
| --- | --- | --- | --- | --- | --- | --- |
| **Site** | **Mean Movement Distance** | **Median Movement Distance** | **Maximum Movement Distance** | **Mean Movement Distance** | **Median Movement Distance** | **Maximum Movement Distance** |
| RR3 | 49.3 ± 25.9 | 50 | 100 | 50.2 ± 37.3 | 50 | 100 |
| RR10 | 35.0 ± 26.8 | 25 | 100 | 47.8 ± 37.9 | 33.3 | 100 |
| RR18 | 40.4 ± 25.0 | 50 | 100 | 19.8 ± 8.47 | 16.7 | 33.3 |
| All Sites | 39.4 ± 25.7 | 50 | 100 | 38.1 ± 32.4 | 25 | 100 |
|  | ***Erebus camprimulgus* (female)** | | | ***Erebus gemmans*** | | |
| **Site** | **Mean Movement Distance** | **Median Movement Distance** | **Maximum Movement Distance** | **Mean Movement Distance** | **Median Movement Distance** | **Maximum Movement Distance** |
| RR3 | 43.6 ± 27.9 | 33.3 | 100 | 75.0 ± 28.9 | 75 | 100 |
| RR10 | 56.9 ± 35.8 | 33.3 | 100 | NA | NA | NA |
| RR18 | 33.9 ± 15.9 | 50 | 50 | 45.0 ± 34.1 | 25 | 100 |
| All Sites | 45.1 ± 25.1 | 50 | 100 | 52.1 ± 34.6 | 50 | 100 |
|  | ***Hypoprya* spp.** | | | ***Erebus ephesperis*** | | |
| **Site** | **Mean Movement Distance** | **Median Movement Distance** | **Maximum Movement Distance** | **Mean Movement Distance** | **Median Movement Distance** | **Maximum Movement Distance** |
| RR3 | NA | NA | NA | 26.9 ± 11.8 | 25 | 50 |
| RR10 | 26.2 ± 22.2 | 18.3 | 100 | 49.0 ± 31.7 | 50 | 100 |
| RR18 | 26.3 ± 14.9 | 25 | 50 | 32.7 ± 25.8 | 25 | 100 |
| All Sites | 26.2 ± 19.2 | 20 | 100 | 34.4 ± 26.3 | 25 | 100 |

**Supplementary Figure**


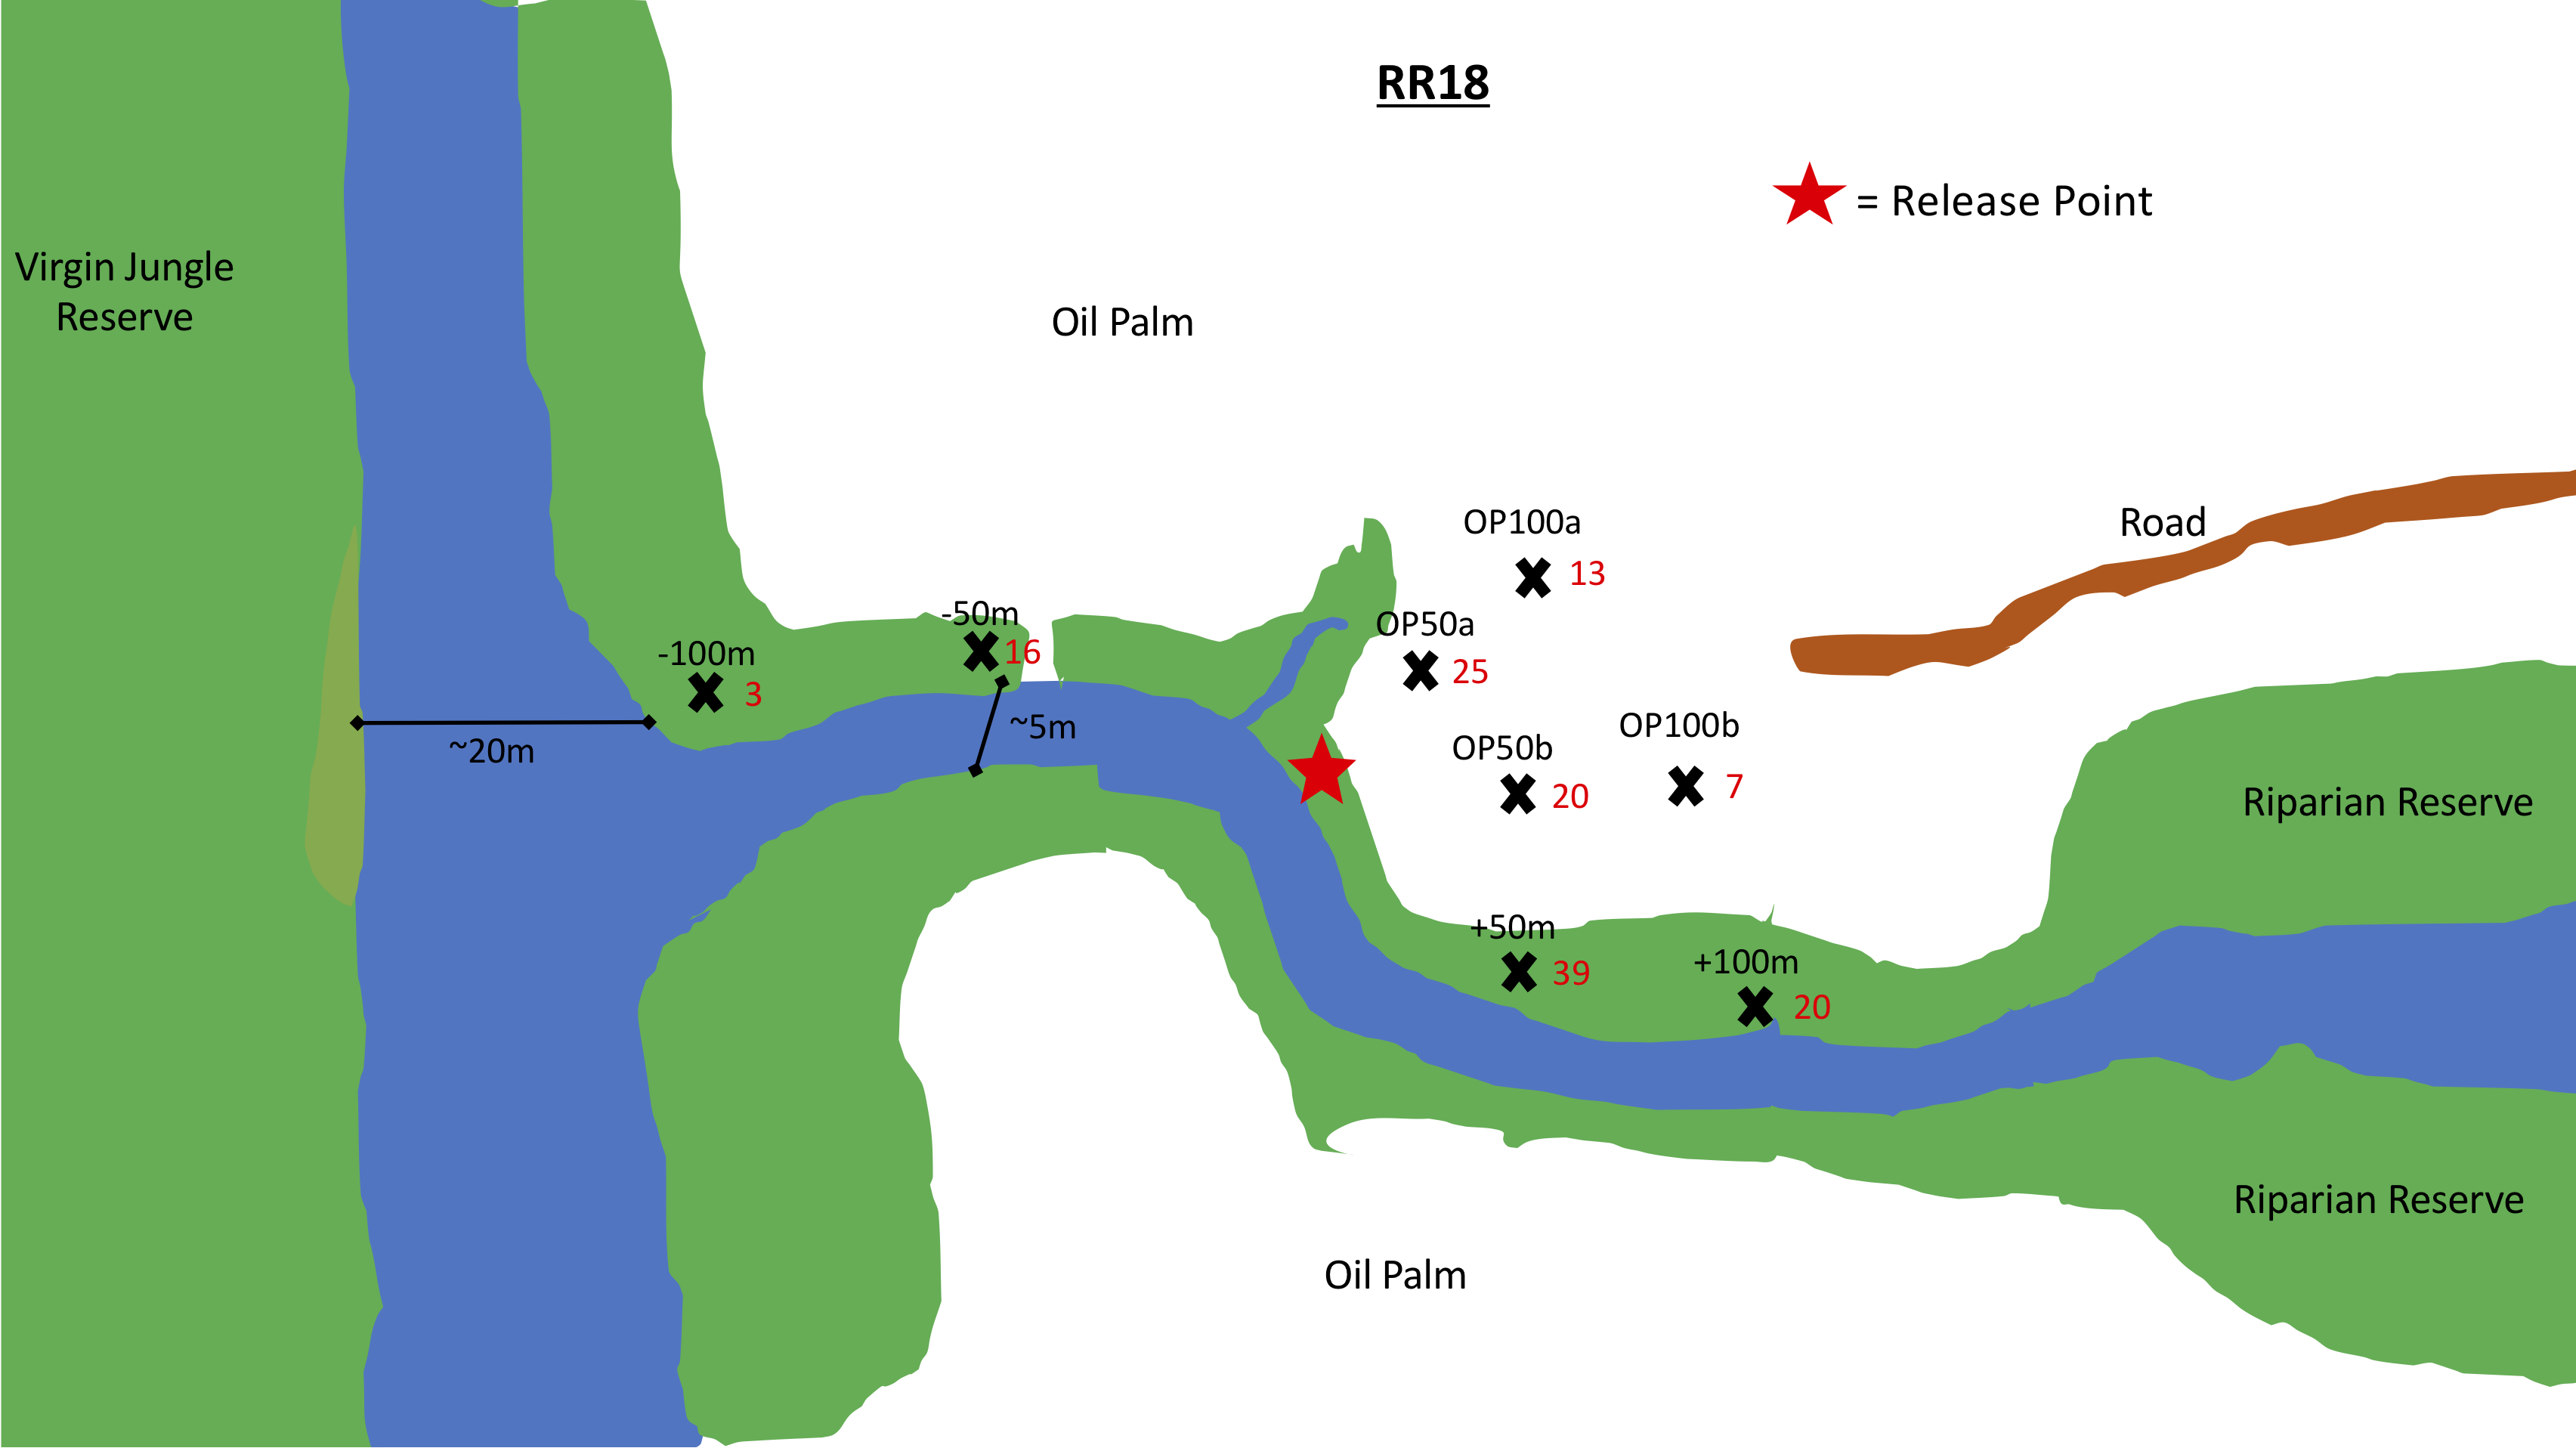

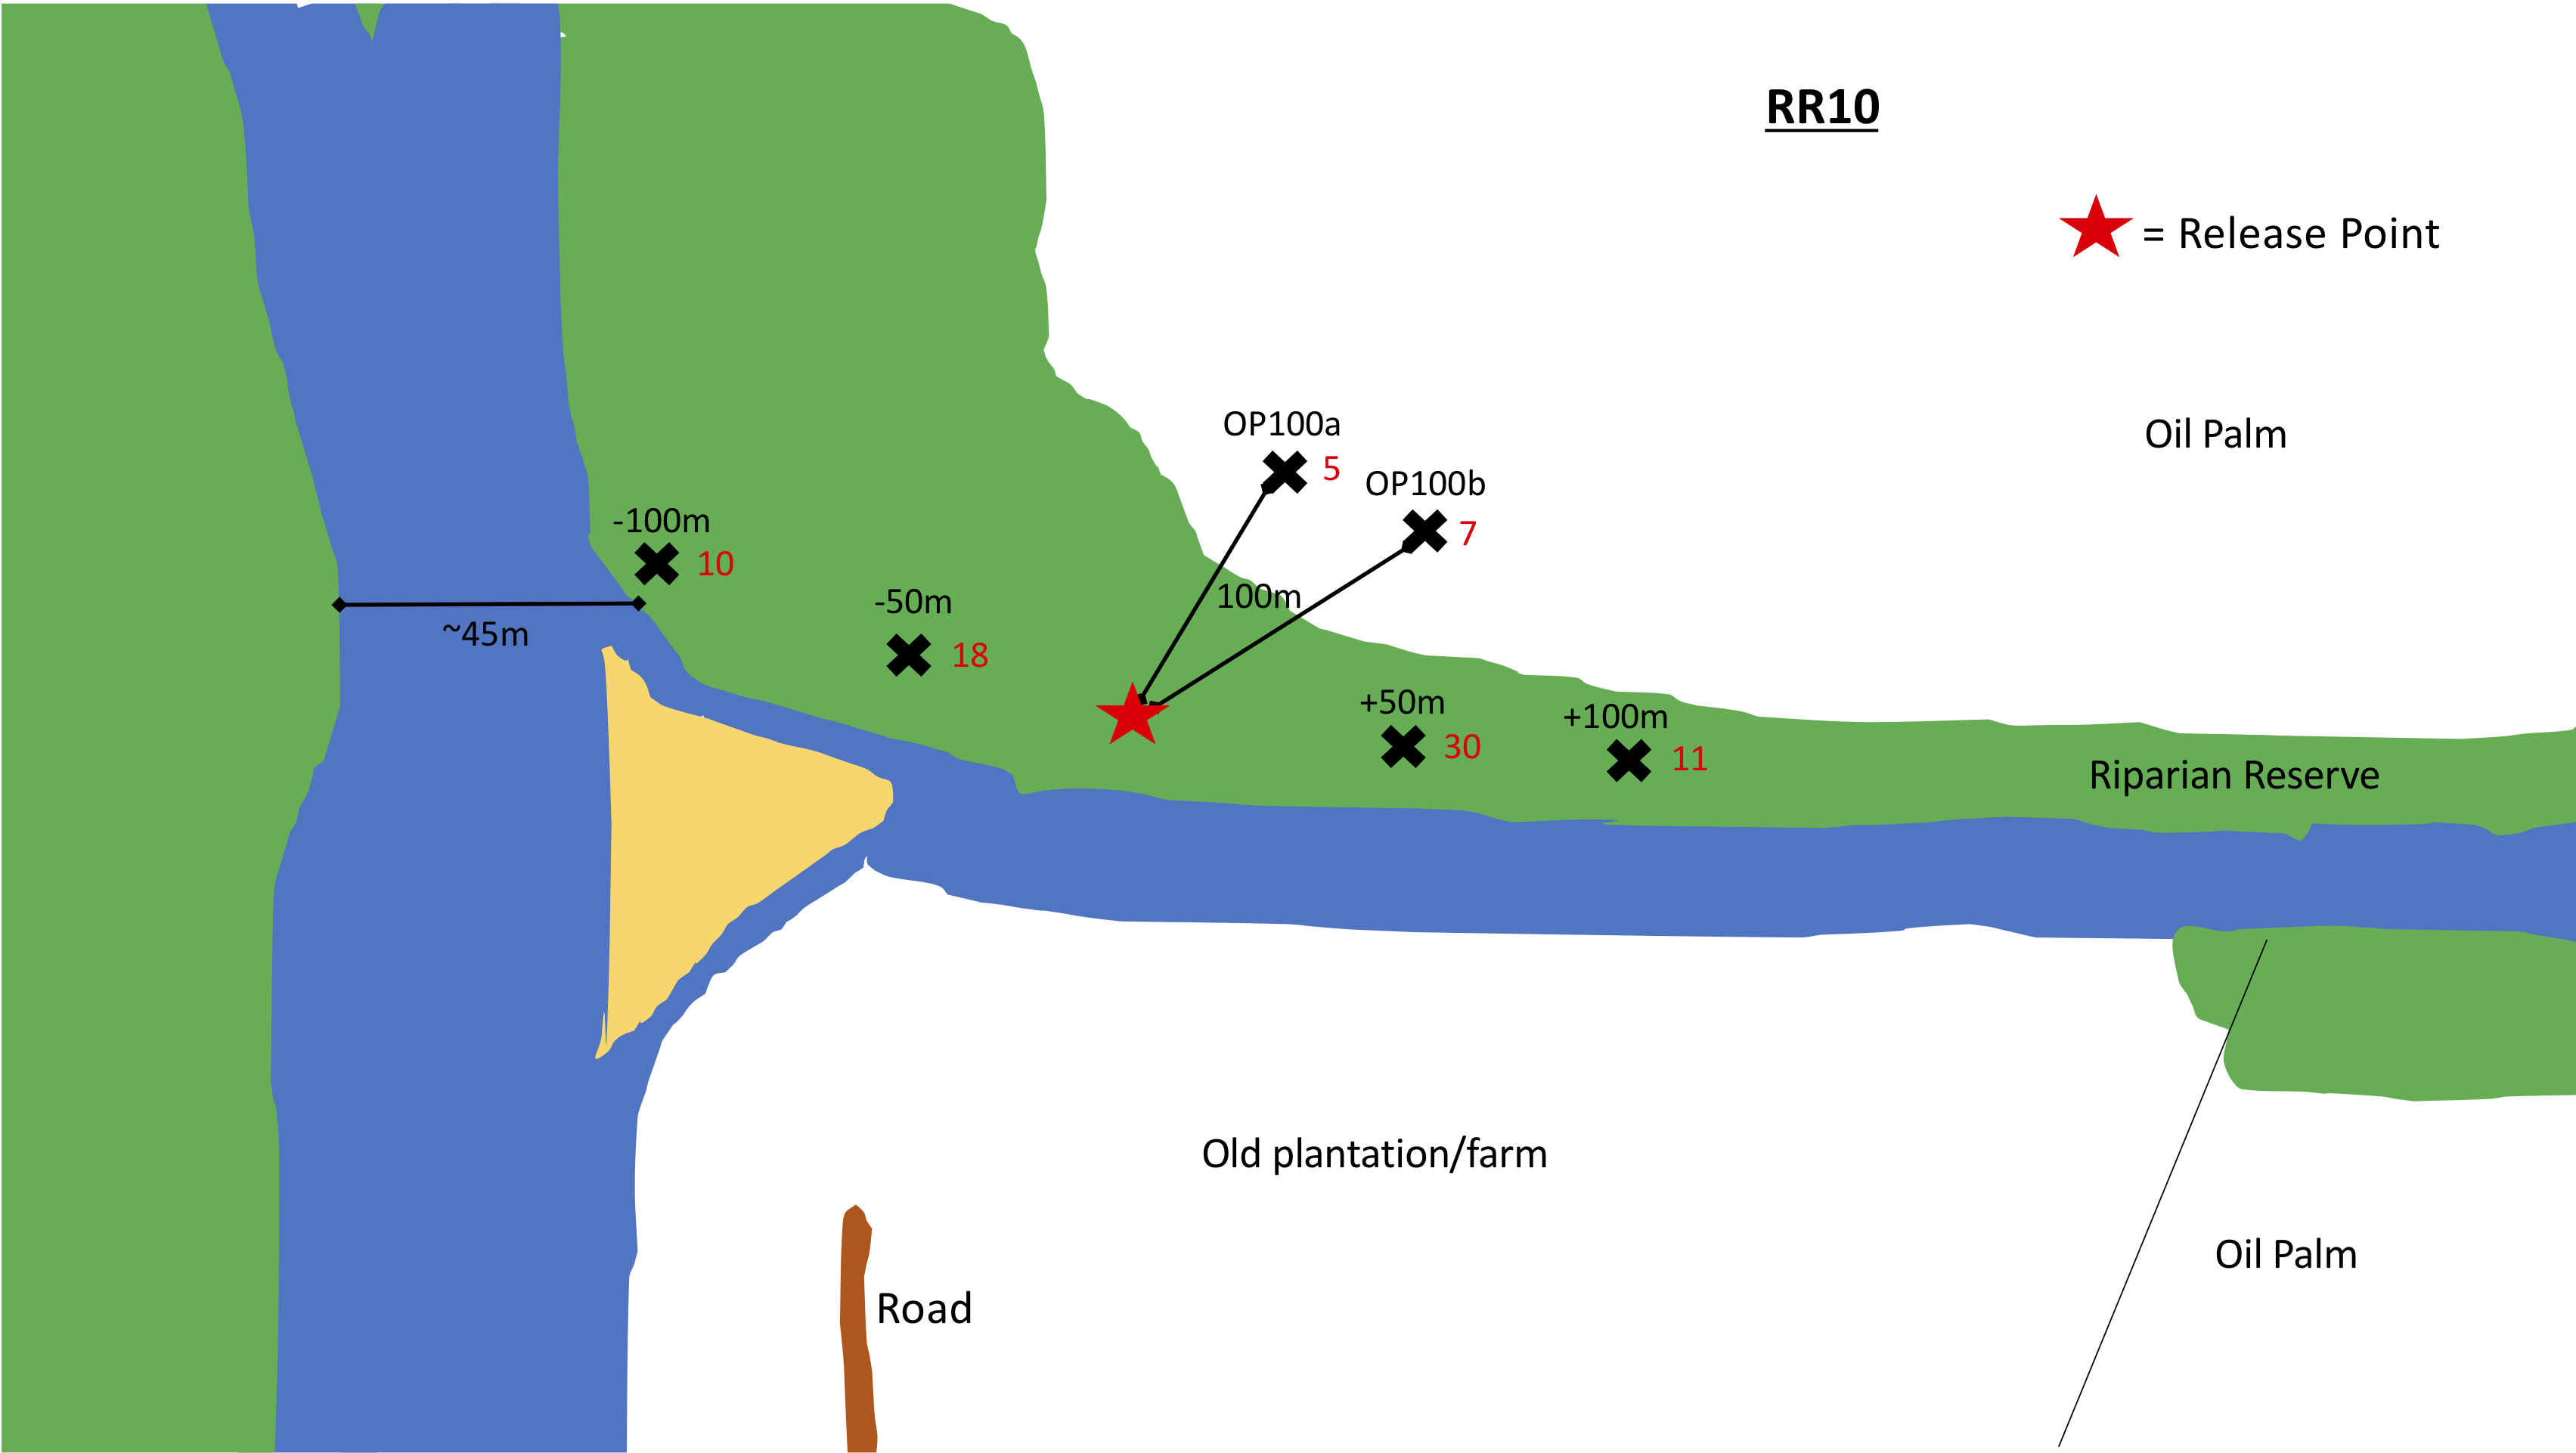

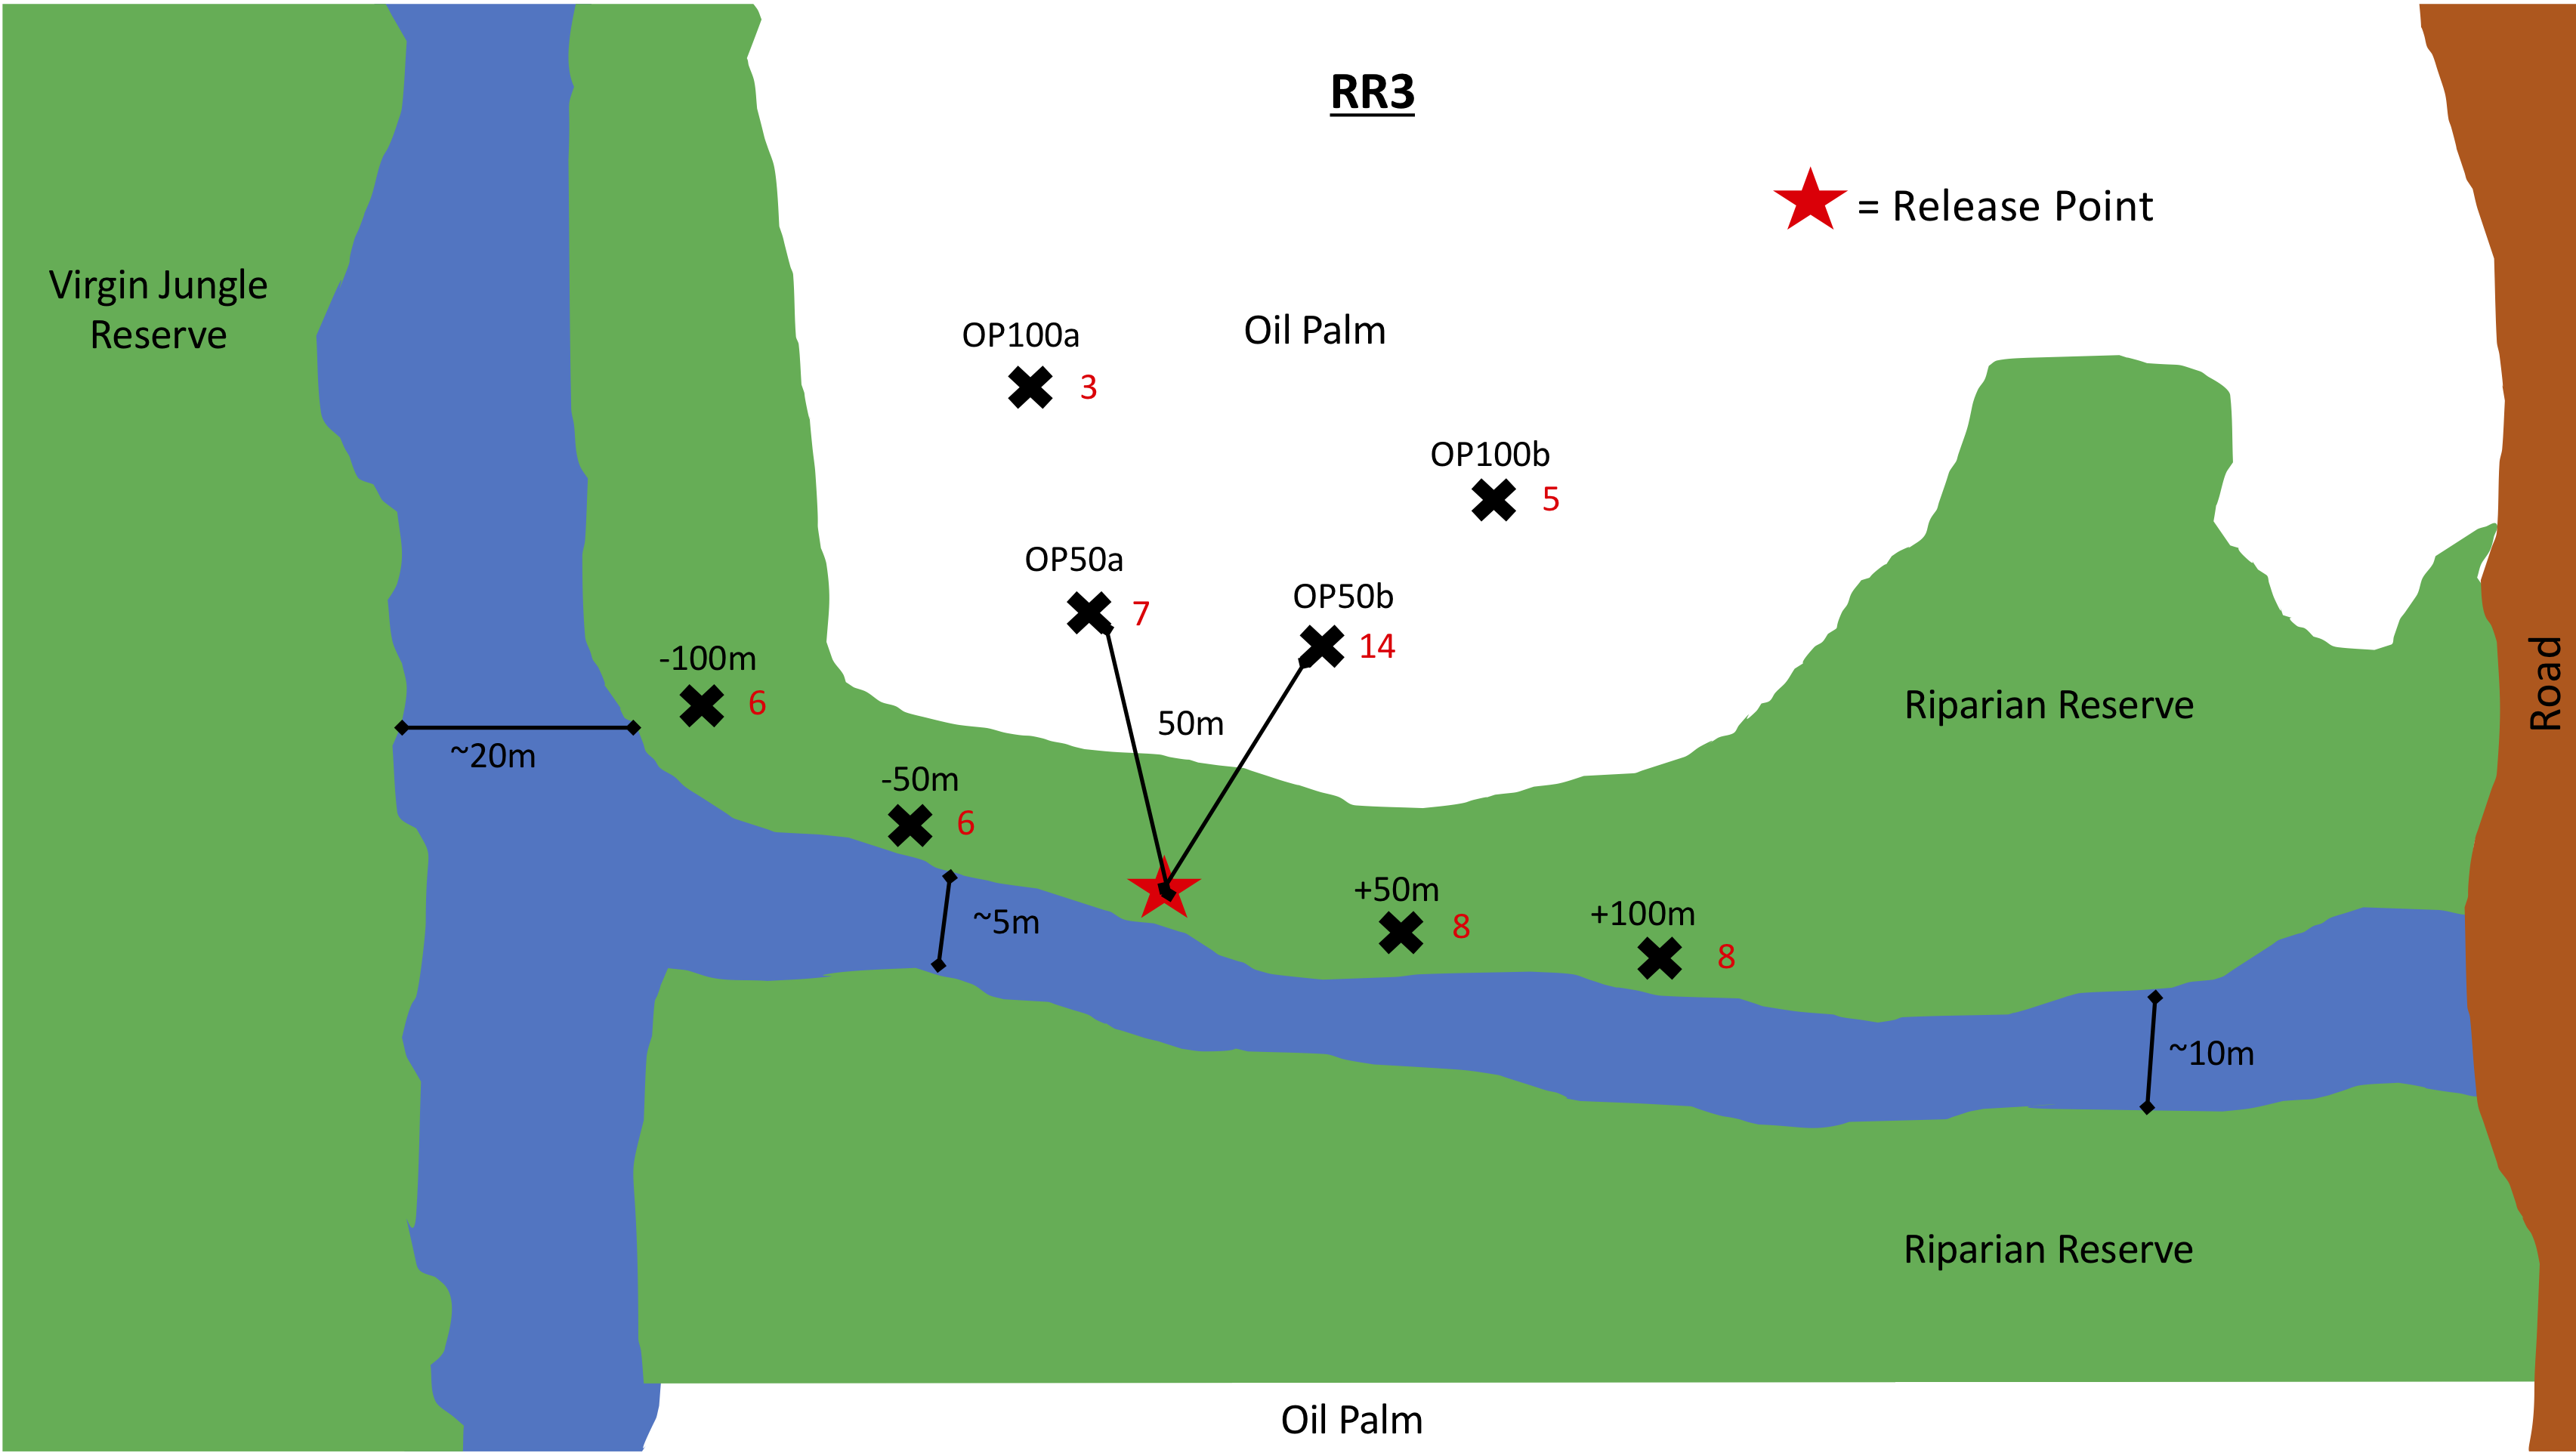


Figure S1. Schematic diagrams showing the approximate layout of the three study sites (not to scale). Crosses represent fruit-baited moth traps. Numbers in red indicate the total number of moths recaptured within each trap.
